# Supplementary material for: Isolation and Molecular characterization of a Novel Bacteriophage SVV09-A: Targeted to Staphylococcus ureilyticus from Diabetic Wounds
Source: Research Square preprint supplement (doi:10.21203/rs.3.rs-8409739/v1), 2025-12-31
Supplement: Supplementary file 1 [file 58653e25cf535ad9453a4043.docx]

**Isolation and Molecular characterization of a Novel Bacteriophage SVV09-A: Targeted to *Staphylococcus ureilyticus* from Diabetic Wounds**

Lakshmi Sharvani K.S.1, Pritam Kanti Guha2, Swetha Vallabhaneni2, Guru Prasad C2., Vaishnavi R3

Renuka Pallem4., Krishna Vamsi M4., Vijaya Lakshmi D1., Vijaya Raghava Prasad D1.

**Supplementary figures:**


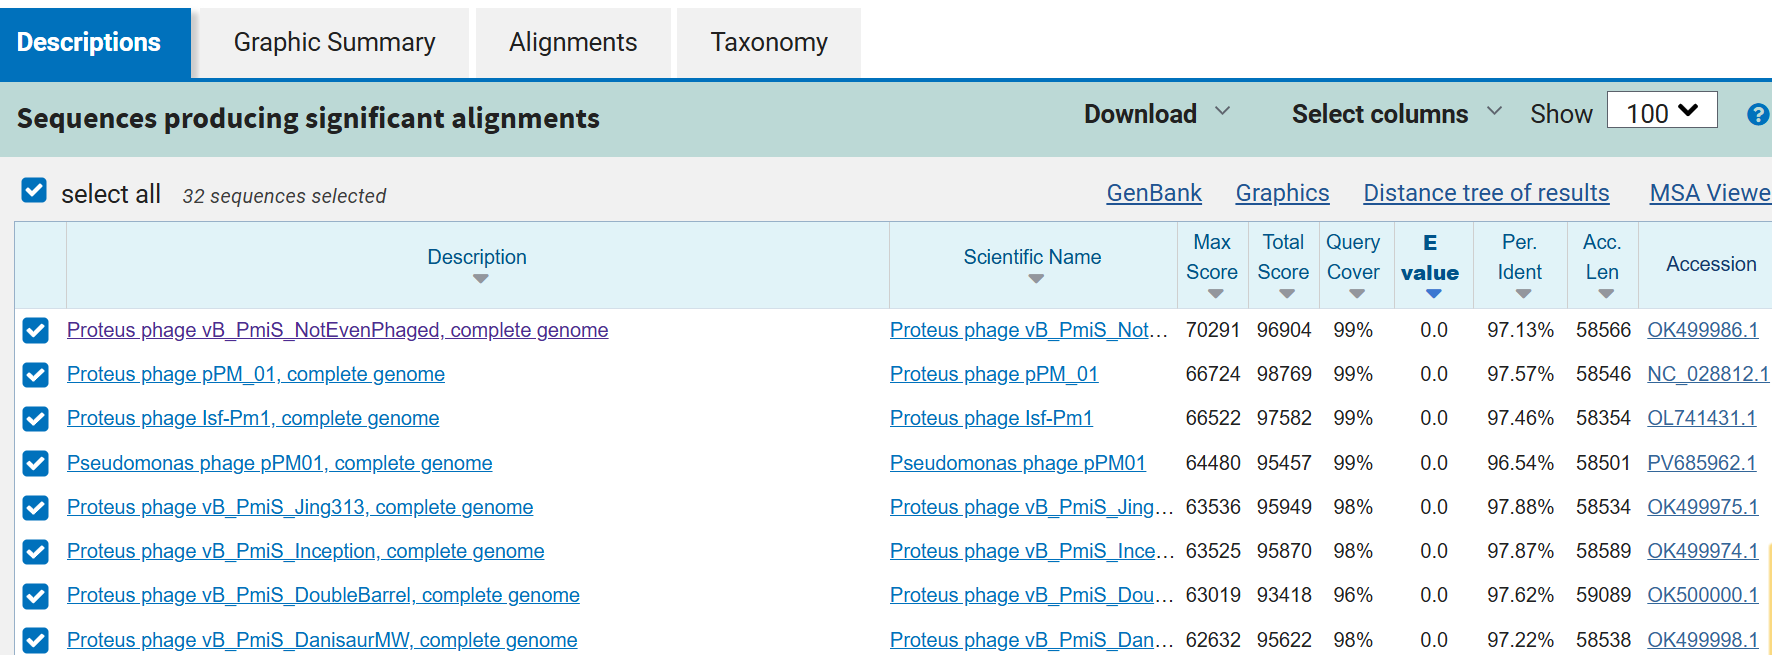


Fig S1: Blast search against the***Staphylococcus ureilyticus SVV09-A* phage** genome


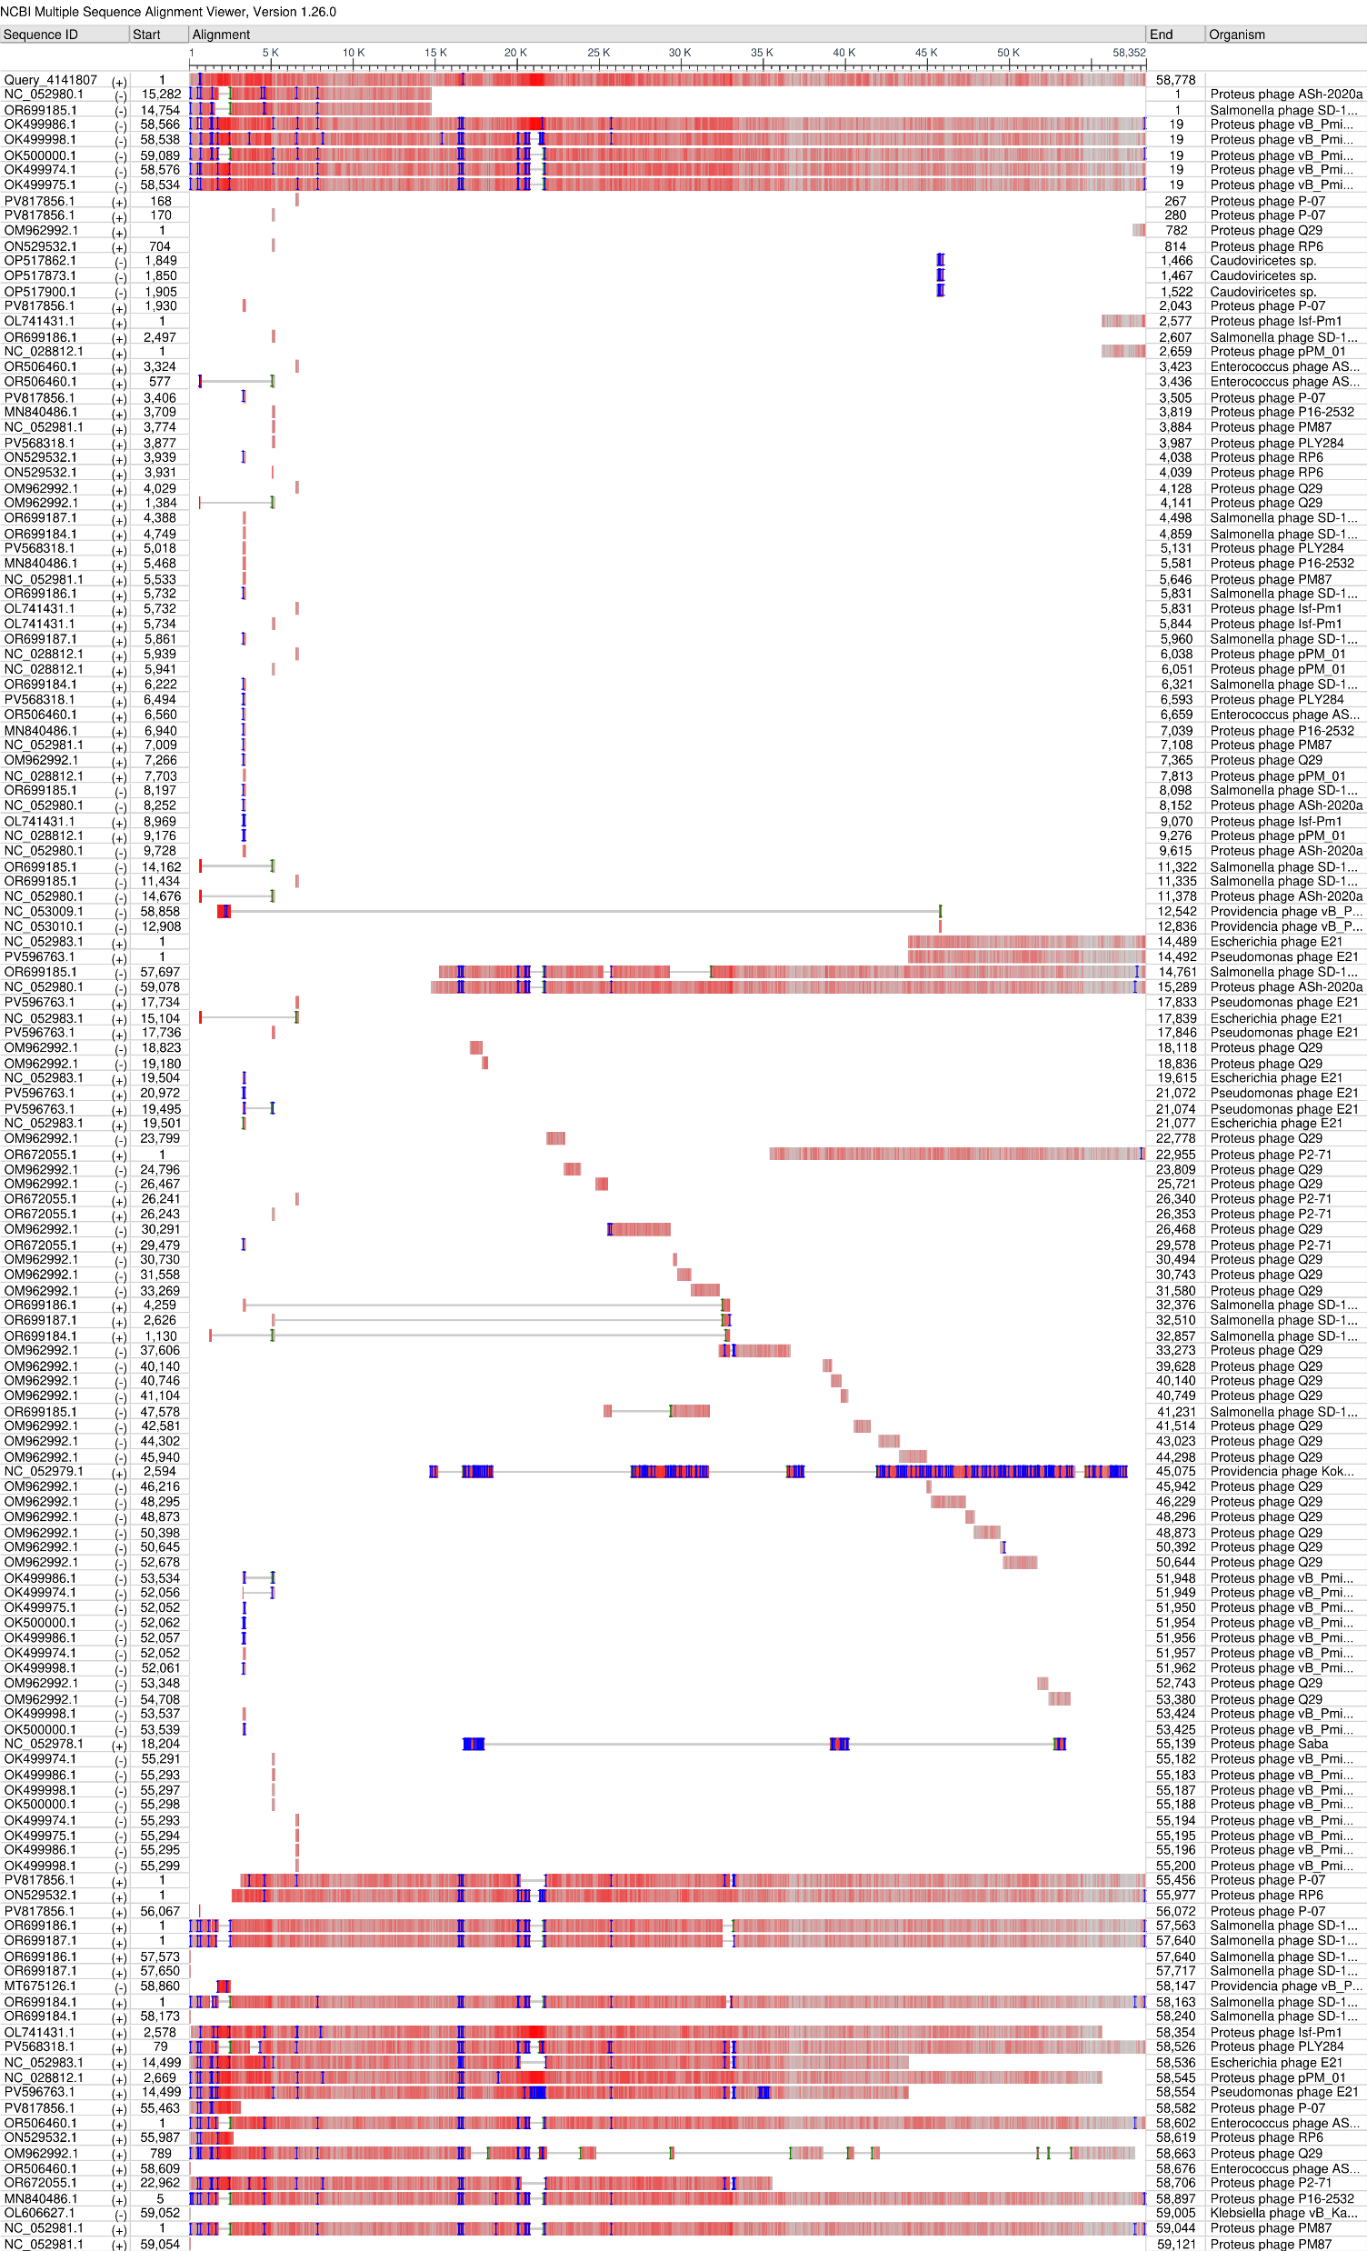


Fig S2: Multiple sequence alignment results of ***Staphylococcus ureilyticus SVV09-A* phage** sequence


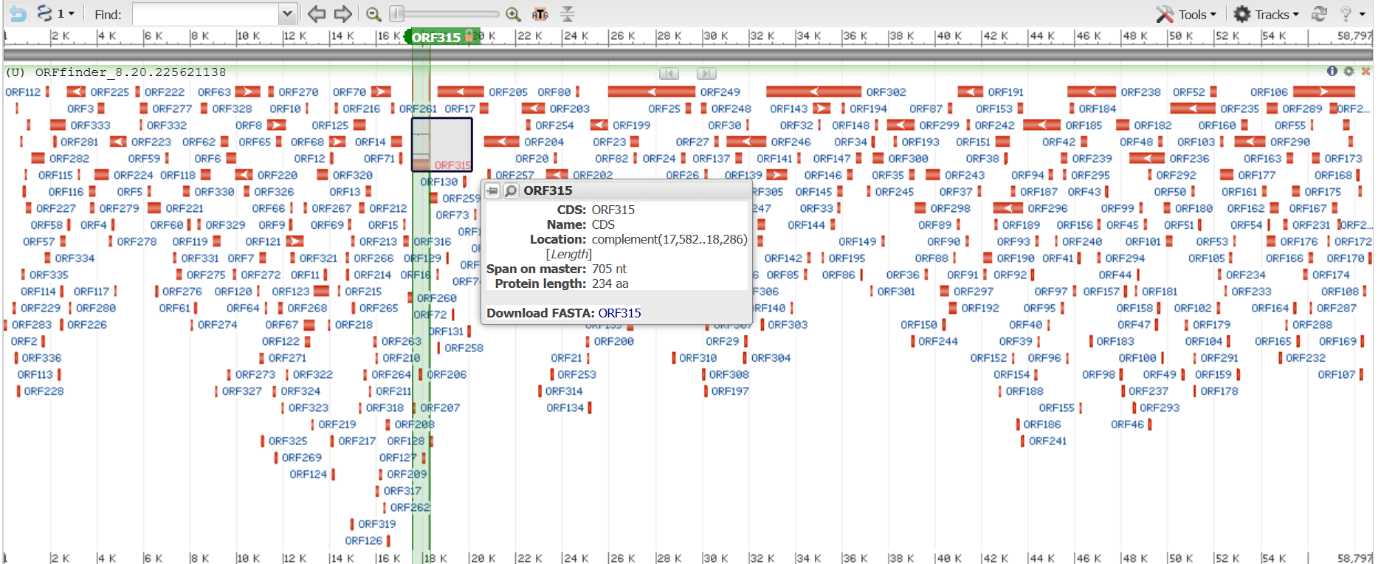


Fig S3: A total of 336 potential ORF’s found from the *SVV09-A* Phage whole genome


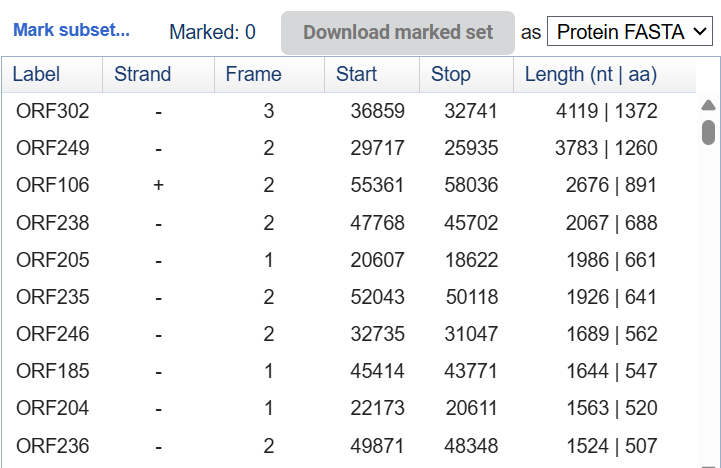


Fig : S4 ORF table


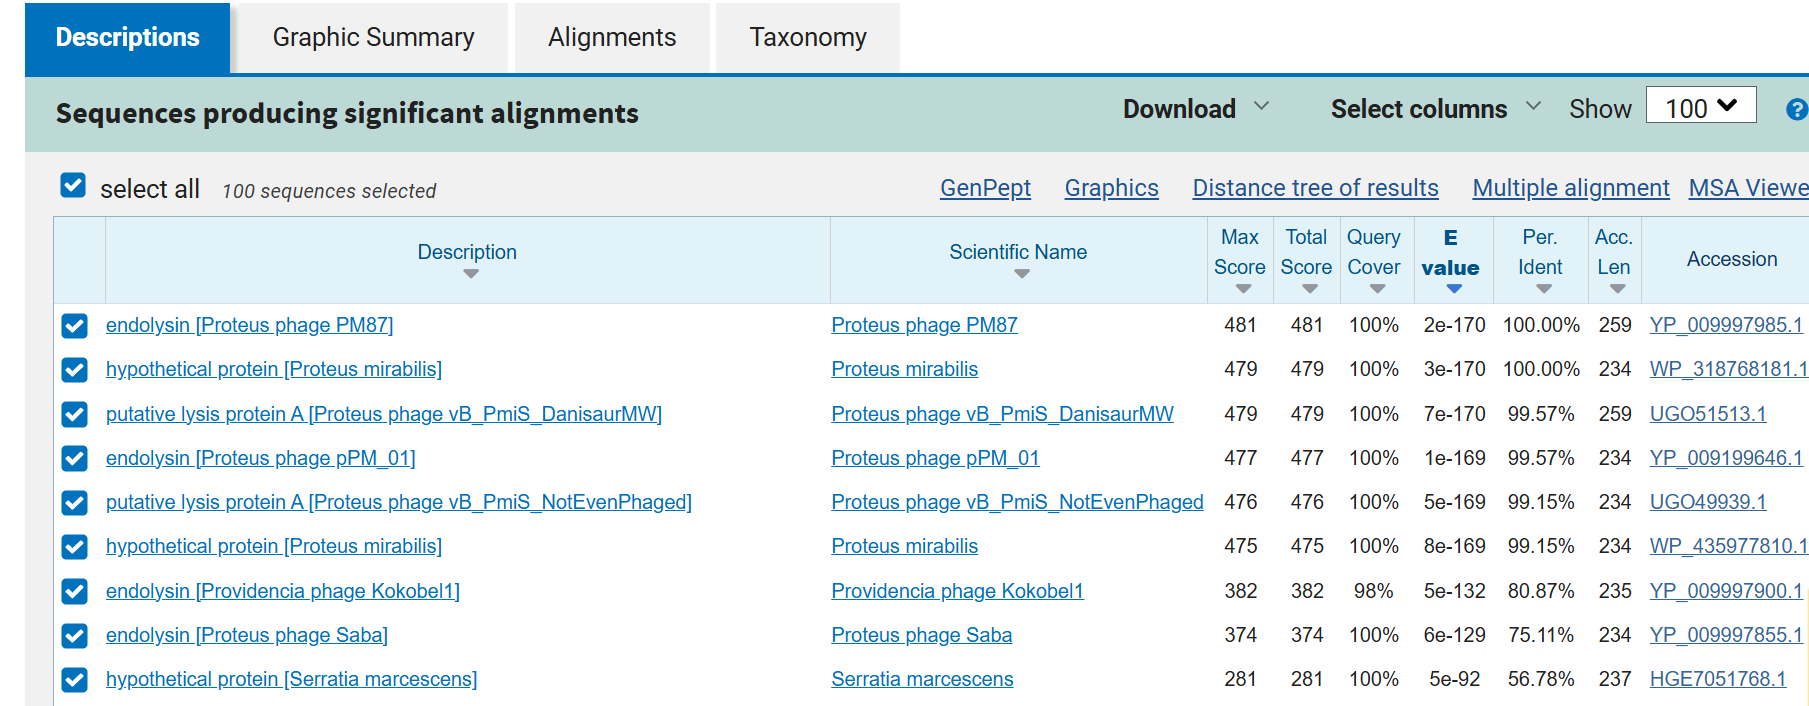
Fig S5: The protein showed the greatest similarity to the amino acid sequence of endolysin from *Proteus* phage PM87, displaying 100% identity.

Gene of Interest with maximum hit

Divergence observed in MSA


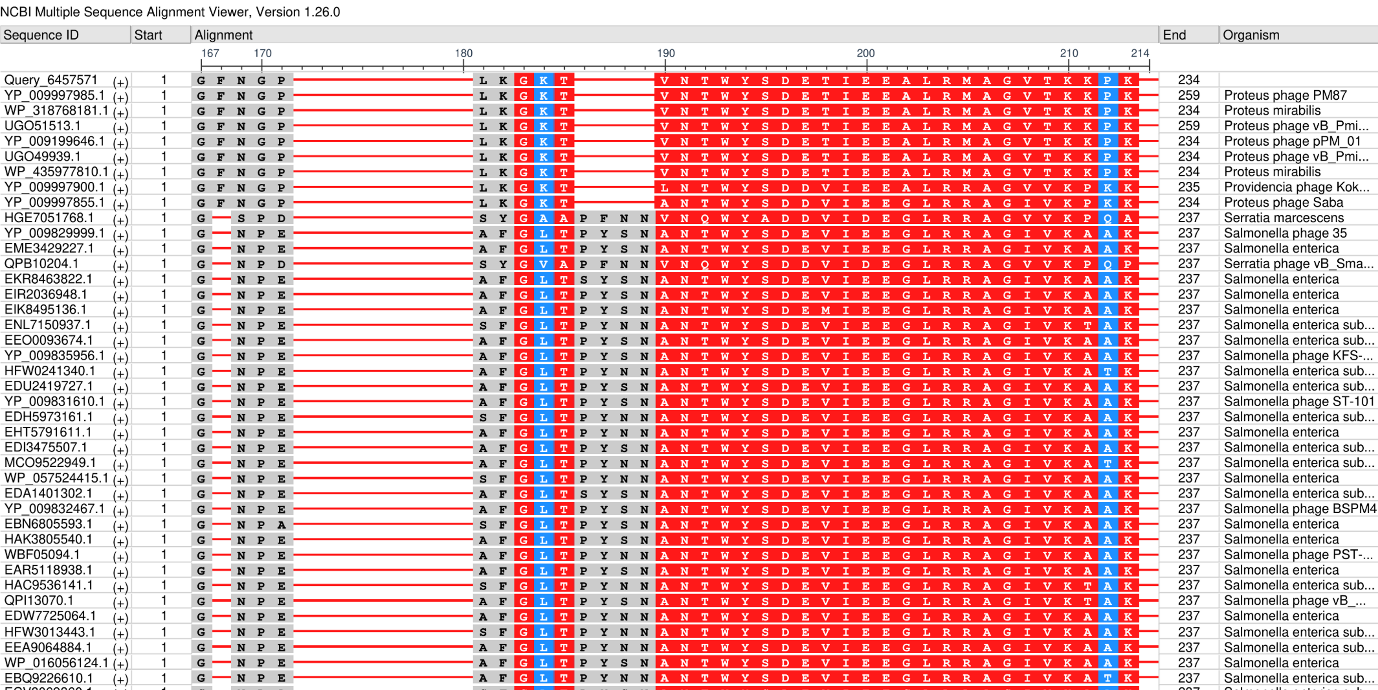


Fig S6: MSA of Putative Endolysin protein with orthologs.
